# Supplementary material for: Characterization of the promoter and extended C-terminal domain of Arabidopsis WRKY33 and functional analysis of tomato WRKY33 homologues in plant stress responses
Source: PubMed Central journal article supplement (PMC4507763; doi:10.1093/jxb/erv221), 2015-05-11
Supplement: supp_erv221_jexbot143446_file001.pdf [file supp_erv221_jexbot143446_file001.pdf]

Supplemental Figure 1

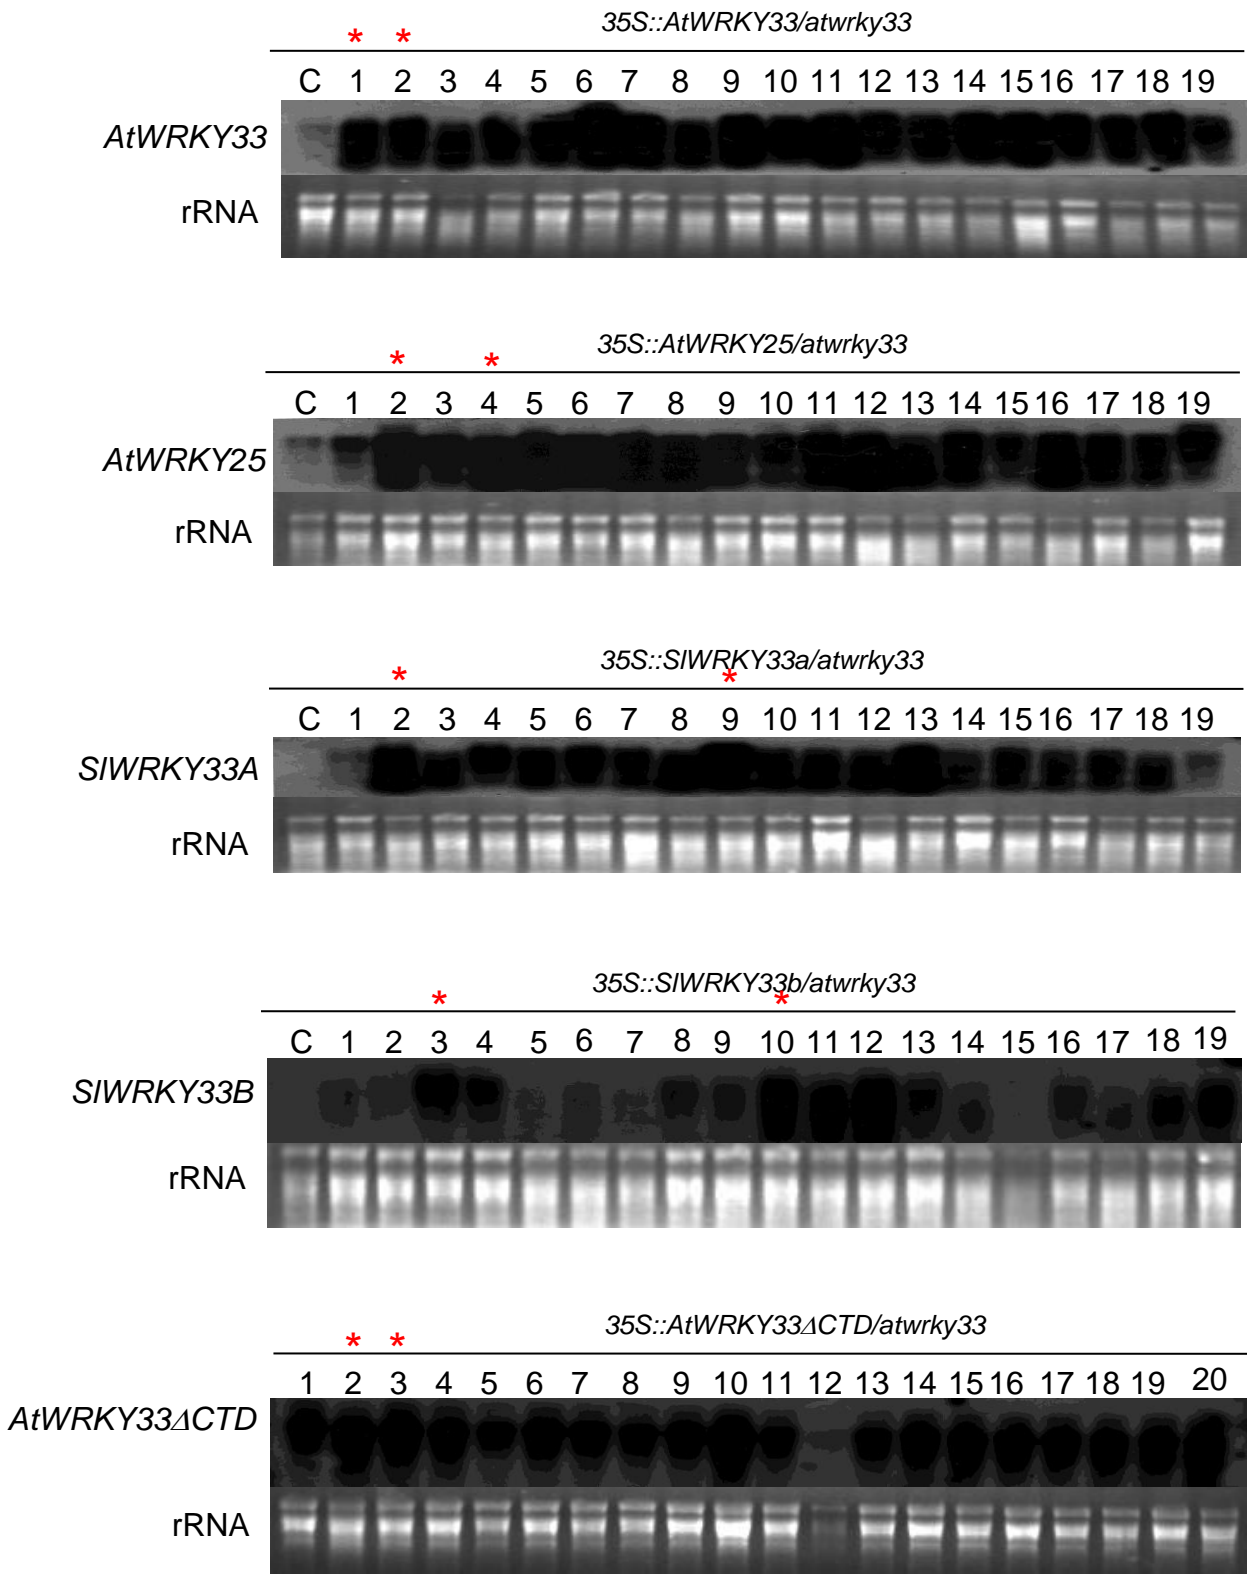

**Supplemental Figure 1.** Expression of WRKY transgenes under control of the constitutive CaMV 35S promoter in the transgenic *atwrky33* mutant plants.

Total RNA was isolated from 5-week old *atwrky33* control plants (C) or independent transgenic *atwrky33* lines harboring a WRKY transgene-overexpressing construct. F2 progeny from two independent lines expressing high levels of a transgene were used for analysis of *Botrytis* resistance and heat tolerance. The transgenic lines selected for further analysis are indicated with asterisks.

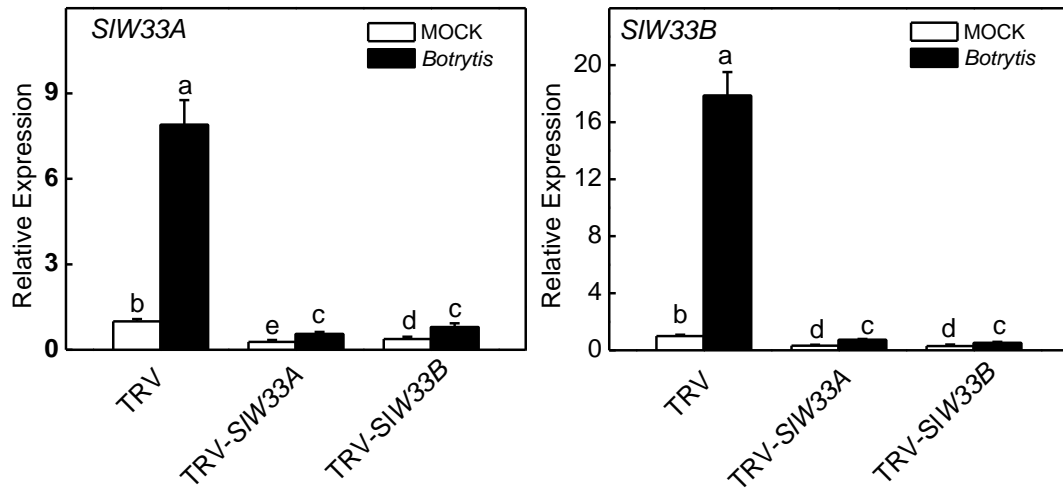

**Supplemental Figure 2.** TRV-mediated silencing of *SIWRKY33A* and *SIWRKY33B*.

*SIWRKY33* transcript levels in mock- and *Botrytis*-inoculated tomato plants infiltrated with *Agrobacterium* cells harboring the empty TVR vector or the silencing TRV-*SIWRKY33A* (TRV-SIW33A) or TRV-*SIWRKY33B* (TRV-SIW33B) vector. Total RNA was isolated for qRT-PCR analysis from the terminal leaflets of the fourth leaves of *Agrobacterium*-infiltrated tomato plants harvested at 3 dpi. Error bars indicate SE ( $n = 3$ ). According to Duncan's multiple range test ( $P = 0.05$ ), means of lesion areas do not differ significantly if they are indicated with the same letter.

A

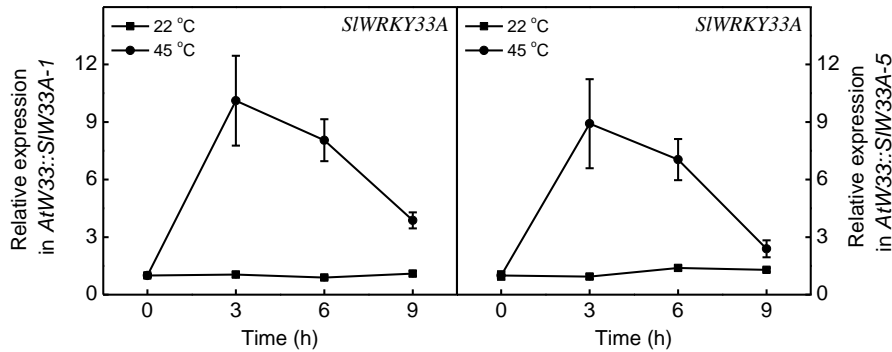

B

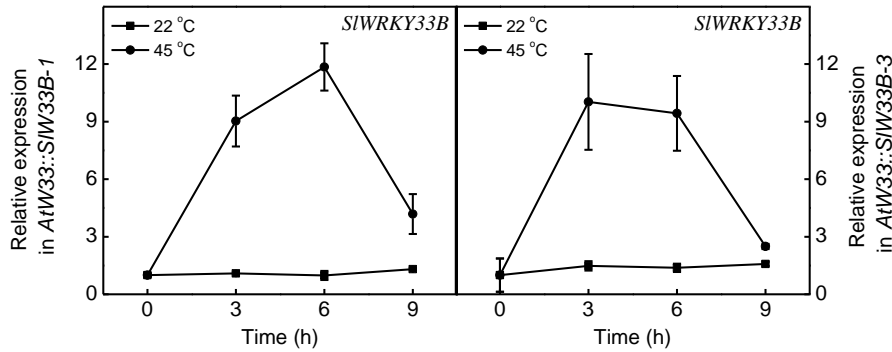

**Supplemental Figure 3.** Heat-induced tomato *SIWRKY33* transgene expression conferred by the *AtWRKY33* promoter in the transgenic *atwrky33* mutant plants.

Total RNA was isolated from the first and second lines of transgenic *atwrky33* mutant plants harboring the *SIWRKY33A* (A) and the first and third lines of harboring the *SIWRKY33B* (B) under the control of the *AtWRKY33* promoter (*AtW33::SIW33A* and *AtW33::SIW33B*, respectively) harvested at indicated time at 45°C. Transcript levels were determined using qRT-PCR. Error bars indicate SE ( $n = 3$ ).

**Supplemental Table S1.** Primers for PCR amplification of WRKY gene promoters and coding sequences (CDS).

| Name                     | Cloning Restriction sites | Primer                                                                                    |
|--------------------------|---------------------------|-------------------------------------------------------------------------------------------|
| <i>AtWRKY25</i> promoter | HidIII<br>Sacl            | F: 5'TTCCCAATCCATTGGTAGTCA 3'<br>R: 5'ATCGAGCTCAAACAGAGGATTCGCTAAAA 3'                    |
| <i>AtWRKY33</i> promoter | HidIII<br>Sacl            | F: 5'ATCAAGCTTCCACATATCGTGCAATAAGAACT 3'<br>R: 5'ATCGAGCTCACGAAAATGGAAGTTTGTTTATAAAAGA 3' |
| <i>AtWRKY25</i> CDS      | Sacl<br>BamHI             | F: 5'ATCGACCTCATGTCTTCCACTTCTTTCACCGA 3'<br>R: 5'ATCGGATCCTCACGAGCGACGTAGCGCGGT 3'        |
| <i>AtWRKY33</i> CDS      | Sacl<br>BamHI             | F: 5'ATCGACCTCATGGCTGCTTCTTTTCTTACAATGG 3'<br>R: 5'ATCGGATCCAGGGCATAAACGAATCGAAAA 3'      |
| <i>AtWRKY33</i> CDS      | Sacl<br>BamHI             | F: 5'ATCGACCTCATGGCTGCTTCTTTTCTTACAATGG 3'<br>R: 5'ATCGGATCCAAACCACGAGCTGCAGGAACATC 3'    |
| <i>SIWRKY33</i> A CDS    | Sacl<br>BamHI             | F: 5'ATCGACCTCATGGCTGCTTCAAGTTTCTCT 3'<br>R: 5'ATCGGATCCTCGAGGCTCGTCCTTAGTTC 3'           |
| <i>SIWRKY33</i> B CDS    | KpnI<br>SmaI              | F: 5'ATCGGTACCATGGCTTCTTCAGGTGGAAT 3'<br>R: 5'GCTGAAGAATAAATCATCTTTGGGTT 3'               |

**Supplemental Table S2.** Primers for qRT-PCR

| GENE NAME        | PRIMERS                          |                                |
|------------------|----------------------------------|--------------------------------|
|                  | FORWARD                          | REVERSE                        |
| <i>AtWRKY33</i>  | TACGAAGGGAAACACAACCA             | AAGGCCCGGTATTAGTGTTG           |
| <i>AtActin2</i>  | CTAACCTCTCTCAAGATCAAA<br>GGCT    | ACTAAAACGCAAACGAAAGC<br>GG     |
| <i>BcActin</i>   | AATGTTACCATACAAATCCTT<br>ACGGACA | ACTCATATGTTGGAGATGAAG<br>CGCAA |
| <i>SIWRKY33A</i> | GCATTACTGTCAACCATCGC             | AACTTCGCGGATTCTCACTT           |
| <i>SIWRKY33B</i> | CCACAACAGTCTGAAATGGG             | CAGCAAAGCAATGACTCCAT           |
| <i>SIActin</i>   | TGTCCCTATTTACGAGGGTTA<br>TGC     | CAGTTAAATCACGACCAGCAA<br>GAT   |
